# Supplementary material for: The components of an electrical synapse as revealed by expansion microscopy of a single synaptic contact
Source: eLife journal article supplement (doi:10.7554/elife.91931), 2024-07-09
Supplement: supp1 [file elife-91931-supp1-v2.pdf]

| <b>Key Resources Table</b>                       |                                           |                                                        |                                         |                                              |
|--------------------------------------------------|-------------------------------------------|--------------------------------------------------------|-----------------------------------------|----------------------------------------------|
| <b>Reagent type (species) or resource</b>        | <b>Designation</b>                        | <b>Source or reference</b>                             | <b>Identifiers</b>                      | <b>Additional information</b>                |
| strain, strain background ( <i>Danio rerio</i> ) | Tol-056 enhancer trap line                | PMID:19474306                                          | ZFIN:ZDB-ALT-110217-6;<br>PMID:19474306 | <a href="#">Satou et al., 2009</a>           |
| antibody                                         | mouse IgG1 anti-Cx35/36 (monoclonal)      | Millipore                                              | Millipore:MAB3045;<br>RRID:AB_94632     | (1:250)                                      |
| antibody                                         | rabbit anti-Cx35.5 (monoclonal)           | PMID:25484298; Fred Hutch Antibody Technology Facility | FHATF:clone12H5                         | (1:200); <a href="#">Miller et al., 2015</a> |
| antibody                                         | mouse IgG2A anti-Cx34.1 (monoclonal)      | PMID:25484298; Fred Hutch Antibody Technology Facility | FHATF:clone5C10A                        | (1:200); <a href="#">Miller et al., 2015</a> |
| antibody                                         | mouse IgG1 anti-ZO1 (monoclonal)          | Invitrogen                                             | Invitrogen:33-9100;<br>RRID:AB_2533147  | (1:200)                                      |
| antibody                                         | mouse IgG1 anti-N-cadherin (monoclonal)   | BD Transduction Laboratories                           | BD:610920; RRID:AB_2077527              | (1:50)                                       |
| antibody                                         | mouse IgG1 anti-Beta-catenin (monoclonal) | Sigma                                                  | Sigma:C7207; RRID:AB_476865             | (1:100)                                      |
| antibody                                         | chicken IgY anti-GFP (polyclonal)         | Abcam                                                  | Abcam:ab13970;<br>RRID:AB_300798        | (1:200)                                      |
| antibody                                         | rabbit IgG anti-GluR2/3 (polyclonal)      | Millipore                                              | Millipore:07-598;<br>RRID:AB_11213931   | (1:200)                                      |
| antibody                                         | mouse IgG- Alexa Fluor 546 (polyclonal)   | Invitrogen                                             | Invitrogen:A11030                       | (1:200)                                      |
| antibody                                         | mouse IgG- Alexa fluor 647 (polyclonal)   | Invitrogen                                             | Invitrogen:A21235                       | (1:200)                                      |
| antibody                                         | mouse IgG- Atto 647N (polyclonal)         | Sigma-Aldrich                                          | Sigma-Aldrich:50185                     | (1:200)                                      |
| antibody                                         | rabbit IgG- Alexa fluor 546 (polyclonal)  | Invitrogen                                             | Invitrogen:A11010                       | (1:200)                                      |
| antibody                                         | rabbit IgG- Atto 647N (polyclonal)        | Sigma-Aldrich                                          | Sigma-Aldrich:40839                     | (1:200)                                      |
| antibody                                         | chicken IgY- Alexa Fluor 488 (polyclonal) | Invitrogen                                             | Invitrogen:A11039                       | (1:200)                                      |

|                         |                                               |                          |                                                                   |                                         |
|-------------------------|-----------------------------------------------|--------------------------|-------------------------------------------------------------------|-----------------------------------------|
| chemical compound, drug | Acryloyl-X SE                                 | Invitrogen               | Invitrogen:A20770                                                 |                                         |
| chemical compound, drug | 1M Tris (pH 8.0)                              | Invitrogen               | Invitrogen:AM9855G                                                |                                         |
| chemical compound, drug | 0.5M EDTA                                     | Invitrogen               | Invitrogen:AM9260G                                                |                                         |
| chemical compound, drug | ddH <sub>2</sub> O (cell culture grade water) | Sigma-Aldrich            | Sigma-Aldrich:W3500                                               |                                         |
| chemical compound, drug | N,N' methylenebisacrylamide                   | Sigma-Aldrich            | Sigma-Aldrich:M7279                                               |                                         |
| chemical compound, drug | Ammonium Persulfate (APS)                     | Sigma-Aldrich            | Sigma-Aldrich:A3678                                               |                                         |
| chemical compound, drug | 4-hydroxy-TEMPO (4-HT)                        | Sigma-Aldrich            | Sigma-Aldrich:176141                                              |                                         |
| chemical compound, drug | Sodium Acrylate                               | Sigma-Aldrich            | Sigma-Aldrich:408220                                              |                                         |
| chemical compound, drug | acrylamide                                    | Sigma-Aldrich            | Sigma-Aldrich:A9099                                               |                                         |
| chemical compound, drug | Tetramethylethylenediamine (TEMED)            | Sigma-Aldrich            | Sigma-Aldrich:T7024                                               |                                         |
| chemical compound, drug | DMSO (Dimethyl sulfoxide)                     | Honeywell                | Honeywell:67685                                                   |                                         |
| chemical compound, drug | NaCl (Sodium Chloride)                        | Sigma-Aldrich            | Sigma-Aldrich:S9888                                               |                                         |
| chemical compound, drug | 10X PBS                                       | Sigma-Aldrich            | Sigma-Aldrich:6506-OP                                             |                                         |
| chemical compound, drug | 100-X Triton                                  | Sigma-Aldrich            | Sigma-Aldrich:X100                                                |                                         |
| chemical compound, drug | MS-222 (tricaine methanesulphonate)           | Sigma-Aldrich            | Sigma-Aldrich:A5040                                               |                                         |
| chemical compound, drug | trichloroacetic acid                          | Sigma-Aldrich            | Sigma-Aldrich:T6399                                               |                                         |
| chemical compound, drug | Normal Goat Serum                             | Vector Laboratories      | Vector:S-1000                                                     |                                         |
| chemical compound, drug | ProLong Gold antifade                         | Invitrogen               | Invitrogen:P36930                                                 |                                         |
| chemical compound, drug | Proteinase K                                  | Thermo Fisher Scientific | TFS:EO0491                                                        |                                         |
| chemical compound, drug | Poly-D-Lysine                                 | Sigma-Aldrich            | Sigma-Aldrich:A-003-E                                             |                                         |
| software, algorithm     | GraphPad Prism                                | Graph Pad Software       | <a href="https://www.graphpad.com/">https://www.graphpad.com/</a> |                                         |
| software, algorithm     | Photoshop                                     | Adobe                    | <a href="https://www.adobe.com/">https://www.adobe.com/</a>       | Adobe Photoshop<br>CC 2015              |
| software, algorithm     | Illustrator                                   | Adobe                    | <a href="https://www.adobe.com/">https://www.adobe.com/</a>       | Adobe Illustrator<br>CC 2015            |
| software, algorithm     | FIJI                                          | PMID:22743772            | PMID:22743772; <a href="https://fiji.sc/">https://fiji.sc/</a>    | <a href="#">Schindelin et al., 2012</a> |

|                     |                                       |                       |                                                                                                                 |   |
|---------------------|---------------------------------------|-----------------------|-----------------------------------------------------------------------------------------------------------------|---|
| software, algorithm | ZEN (black edition)                   | Carl Zeiss Microscopy | <a href="https://www.micro-shop.zeiss.com/en/us/">https://www.micro-shop.zeiss.com/en/us/</a>                   | - |
| software, algorithm | Canvas                                | Canvas                | <a href="https://www.canvasgfx.com/products/canvas-x-draw">https://www.canvasgfx.com/products/canvas-x-draw</a> |   |
| other               | LSM 710 and LSM 880 Zeiss microscopes | Carl Zeiss Microscopy | <a href="https://www.zeiss.com/corporate/int/home.html">https://www.zeiss.com/corporate/int/home.html</a>       |   |
| other               | 40x 1.0 NA water immersion objective  | Carl Zeiss Microscopy | CZM:421462-9900                                                                                                 |   |
| other               | 63x 1.40 NA oil immersion objective   | Carl Zeiss Microscopy | CZM:420782-9900                                                                                                 |   |
